# Supplementary material for: Genotype-Phenotype Correlations in Neurofibromatosis Type 1: Identification of Novel and Recurrent NF1 Gene Variants and Correlations with Neurocognitive Phenotype
Source: MDPI journal article supplement (doi:10.3390/genes13071130), 2022-06-23
Supplement: s1 [file s1]

# SUPPLEMENTARY TABLES

| ID    | Sex | Age | Clinical Features                                                                                                                                                                                                                                                                      | Clinical Group |
|-------|-----|-----|----------------------------------------------------------------------------------------------------------------------------------------------------------------------------------------------------------------------------------------------------------------------------------------|----------------|
| NF_2  | F   | 34  | <ul style="list-style-type: none"> <li>- CALMs</li> <li>- Cutaneous neurofibromas</li> <li>- Axillary freckling</li> <li>- Lisch nodules</li> </ul>                                                                                                                                    | G1             |
| NF_54 | F   | 47  | <ul style="list-style-type: none"> <li>- CALMs</li> <li>- Cutaneous and subcutaneous neurofibromas</li> <li>- UBOs</li> </ul>                                                                                                                                                          | G1             |
| NF_68 | M   | 35  | <ul style="list-style-type: none"> <li>- CALMs</li> <li>- Cutaneous and subcutaneous neurofibromas</li> <li>- Spinal neurofibromas</li> </ul>                                                                                                                                          | G1             |
| NF_83 | F   | 70  | <ul style="list-style-type: none"> <li>- CALMs</li> <li>- Cutaneous neurofibromas</li> </ul>                                                                                                                                                                                           | G1             |
| NF_89 | F   | 56  | <ul style="list-style-type: none"> <li>- CALMs</li> <li>- Subcutaneous fibromas</li> </ul>                                                                                                                                                                                             | G1             |
| NF_1  | M   | 51  | <ul style="list-style-type: none"> <li>- CALMs</li> <li>- Cutaneous neurofibromas</li> <li>- Axillary and inguinal freckling</li> <li>- Spine deformities (scoliosis)</li> <li>- Learning disabilities</li> <li>- Anxiety disorder</li> </ul>                                          | G2             |
| NF_3  | M   | 65  | <ul style="list-style-type: none"> <li>- Cutaneous neurofibromas</li> <li>- Axillary and inguinal freckling</li> <li>- Cardiovascular disorder (hypertension)</li> <li>- Obesity</li> <li>- Hepatic steatosis</li> <li>- Spine (scoliosis) and bone deformities (pes cavus)</li> </ul> | G2             |

|       |   |    |                                                                                                                                                                                                                                                                                                                    |    |
|-------|---|----|--------------------------------------------------------------------------------------------------------------------------------------------------------------------------------------------------------------------------------------------------------------------------------------------------------------------|----|
| NF_4  | F | 35 | <ul style="list-style-type: none"> <li>- CALMs</li> <li>- Cutaneous neurofibromas</li> <li>- Axillary freckling</li> <li>- Spine deformities (scoliosis)</li> <li>- Bone deformities (bilateral pes cavus)</li> </ul>                                                                                              | G2 |
| NF_5  | F | 44 | <ul style="list-style-type: none"> <li>- CALMs</li> <li>- Subcutaneous neurofibromas</li> <li>- Axillary freckling</li> <li>- Spine deformities (scoliosis)</li> <li>- Anxiety disorder</li> <li>- Cardiovascular disorders (hypertension)</li> </ul>                                                              | G2 |
| NF_8  | M | 33 | <ul style="list-style-type: none"> <li>- Spinal neurofibromas</li> <li>- Spine deformities (scoliosis)</li> <li>- Learning disabilities</li> <li>- Obesity</li> </ul>                                                                                                                                              | G2 |
| NF_10 | F | 26 | <ul style="list-style-type: none"> <li>- CALMs</li> <li>- Subcutaneous neurofibromas</li> <li>- Spine (scoliosis) and bone (dural ectasia) deformities</li> <li>- Cardiovascular disorders (hypertension)</li> <li>- Learning disabilities</li> </ul>                                                              | G2 |
| NF_11 | F | 59 | <ul style="list-style-type: none"> <li>- CALMs</li> <li>- Cutaneous and subcutaneous neurofibromas</li> <li>- Spine (joint spondylosis) and bone (osteoporosis) deformities</li> <li>- Anxiety disorder</li> <li>- Sleep disorder</li> <li>- Cardiovascular disorders (mitral and aortic insufficiency)</li> </ul> | G2 |
| NF_13 | F | 33 | <ul style="list-style-type: none"> <li>- CALMs</li> <li>- Cutaneous neurofibromas</li> <li>- Axillary freckling</li> <li>- Lisch nodules</li> <li>- UBOs</li> <li>- Spine deformities (scoliosis)</li> <li>- Obesity</li> </ul>                                                                                    | G2 |
| NF_20 | M | 18 | <ul style="list-style-type: none"> <li>- Cutaneous neurofibromas</li> <li>- Inguinal freckling</li> <li>- Lisch nodules</li> <li>- Spine (kyphoscoliosis) and bone (foot deformities) deformities</li> <li>- Learning disabilities</li> </ul>                                                                      | G2 |
| NF_21 | F | 28 | <ul style="list-style-type: none"> <li>- CALMs</li> <li>- Subcutaneous neurofibromas</li> <li>- Spine (scoliosis, hydromyelia) and bone (short stature) deformities</li> </ul>                                                                                                                                     | G2 |

|       |   |    |                                                                                                                                                                                                                                                                                                                                                    |    |
|-------|---|----|----------------------------------------------------------------------------------------------------------------------------------------------------------------------------------------------------------------------------------------------------------------------------------------------------------------------------------------------------|----|
|       |   |    | <ul style="list-style-type: none"> <li>- Cardiovascular disorders (mitral insufficiency)</li> <li>- Plexiform neurofibroma in the right medial malleolus</li> </ul>                                                                                                                                                                                |    |
| NF_25 | F | 26 | <ul style="list-style-type: none"> <li>- CALMs</li> <li>- Cutaneous and subcutaneous neurofibromas</li> <li>- Axillary and inguinal freckling</li> <li>- Bone deformities (short stature)</li> <li>- Hearing loss</li> <li>- Learning disabilities</li> </ul>                                                                                      | G2 |
| NF_28 | F | 41 | <ul style="list-style-type: none"> <li>- CALMs</li> <li>- Cutaneous neurofibromas</li> <li>- Spine deformities (lost of the normal cervical lordosis)</li> <li>- Obesity</li> <li>- 25-OH Vitamin D deficiency</li> </ul>                                                                                                                          | G2 |
| NF_30 | F | 45 | <ul style="list-style-type: none"> <li>- CALMs</li> <li>- Cutaneous and subcutaneous neurofibromas</li> <li>- Spinal neurofibromas</li> <li>- Axillary and inguinal freckling</li> <li>- Spine and bone (short stature) deformities</li> <li>- Cardiovascular disorder (hypertension)</li> <li>- UBOs</li> </ul>                                   | G2 |
| NF_38 | M | 27 | <ul style="list-style-type: none"> <li>- CALMs</li> <li>- Behavior disorders</li> <li>- Spine (scoliosis) and bone (short stature) deformities</li> </ul>                                                                                                                                                                                          | G2 |
| NF_40 | F | 41 | <ul style="list-style-type: none"> <li>- CALMs</li> <li>- Cutaneous and subcutaneous neurofibromas</li> <li>- Lisch nodules</li> <li>- Vitamin D 25-OH deficiency</li> <li>- Microcytic anemia</li> <li>- Hearing loss</li> <li>- Spine deformities (kyphoscoliosis)</li> <li>- Fibrocystic mastopathy</li> <li>- Learning disabilities</li> </ul> | G2 |
| NF_43 | F | 30 | <ul style="list-style-type: none"> <li>- CALMs</li> <li>- Subcutaneous neurofibromas</li> <li>- Spine deformities (scoliosis)</li> <li>- Cardiovascular disorder (hypertension)</li> <li>- Anxiety disorder</li> <li>- Breast lump</li> <li>- UBOs</li> </ul>                                                                                      | G2 |
| NF_45 | M | 70 | <ul style="list-style-type: none"> <li>- CALMs</li> <li>- Subcutaneous neurofibromas</li> </ul>                                                                                                                                                                                                                                                    | G2 |

|       |   |    |                                                                                                                                                                                                                                                                                                                                                                       |    |
|-------|---|----|-----------------------------------------------------------------------------------------------------------------------------------------------------------------------------------------------------------------------------------------------------------------------------------------------------------------------------------------------------------------------|----|
|       |   |    | <ul style="list-style-type: none"> <li>- Epilepsy syndrome</li> <li>- Hypercholesterolemia</li> <li>- Hearing loss</li> <li>- Cardiovascular disorders (hypertension)</li> </ul>                                                                                                                                                                                      |    |
| NF_46 | M | 39 | <ul style="list-style-type: none"> <li>- CALMs</li> <li>- Cutaneous and subcutaneous neurofibromas</li> <li>- Spinal neurofibromas</li> <li>- Plexiform neurofibromas of the right sheath</li> <li>- Spine deformities (scoliosis)</li> </ul>                                                                                                                         | G2 |
| NF_47 | M | 36 | <ul style="list-style-type: none"> <li>- CALMs</li> <li>- Subcutaneous neurofibromas</li> <li>- Inguinal freckling</li> <li>- Drug resistant epilepsy syndrome</li> <li>- Spine deformities (scoliosis)</li> </ul>                                                                                                                                                    | G2 |
| NF_48 | F | 39 | <ul style="list-style-type: none"> <li>- CALMs</li> <li>- Subcutaneous neurofibromas</li> <li>- Axillary freckling</li> <li>- UBOs</li> </ul>                                                                                                                                                                                                                         | G2 |
| NF_50 | M | 58 | <ul style="list-style-type: none"> <li>- CALMs</li> <li>- Cutaneous neurofibromas</li> <li>- Axillary and inguinal freckling</li> <li>- Spine deformities (scoliosis)</li> </ul>                                                                                                                                                                                      | G2 |
| NF_51 | F | 29 | <ul style="list-style-type: none"> <li>- CALMs</li> <li>- Cutaneous and subcutaneous neurofibromas</li> <li>- Spinal neurofibromas</li> <li>- Plexiform neurofibroma</li> <li>- UBOs</li> <li>- Erythrocythemia</li> <li>- Spine (disc protrusions) and bone (short stature) deformities</li> <li>- 25-OH Vitamin D deficiency</li> <li>- Anxiety disorder</li> </ul> | G2 |
| NF_53 | F | 23 | <ul style="list-style-type: none"> <li>- CALMs</li> <li>- Spine deformities (scoliosis)</li> <li>- Cardiovascular disorder (coarctation of the aorta)</li> <li>- Anxiety disorder</li> <li>- Learning disabilities</li> </ul>                                                                                                                                         | G2 |
| NF_56 | M | 56 | <ul style="list-style-type: none"> <li>- CALMs</li> <li>- Subcutaneous neurofibromas</li> <li>- Spine (scoliosis) and bone deformities</li> <li>- Cardiovascular disorder (hypertension)</li> <li>- Gastric disorder</li> </ul>                                                                                                                                       | G2 |

|       |   |    |                                                                                                                                                                                                              |    |
|-------|---|----|--------------------------------------------------------------------------------------------------------------------------------------------------------------------------------------------------------------|----|
|       |   |    | - Multiple hepatic cysts                                                                                                                                                                                     |    |
| NF_57 | M | 37 | - CALMs<br>- Cutaneous neurofibromas<br>- Spine (kyphoscoliosis) and bone (short stature) deformities                                                                                                        | G2 |
| NF_59 | M | 52 | - CALMs<br>- Cutaneous and subcutaneous neurofibromas<br>- Inguinal freckling<br>- Lisch nodules<br>- Spine (scoliosis) and bone (pectus carinatum) deformities<br>- Cardiovascular disorders (hypertension) | G2 |
| NF_61 | F | 59 | - Spine (scoliosis) and bone (dural ectasia) deformities<br>- Anxiety and depressive disorder                                                                                                                | G2 |
| NF_62 | F | 32 | - CALMs<br>- Upper limb plexiform neurofibroma<br>- Spine deformities (scoliosis)<br>- Anxiety disorder<br>- D25-OH Vitamin deficiency                                                                       | G2 |
| NF_63 | F | 54 | - CALMs<br>- Cutaneous neurofibromas<br>- Axillary and inguinal freckling<br>- Lisch nodules<br>- Spine deformities (scoliosis)<br>- Hypercholesterolemia                                                    | G2 |
| NF_66 | M | 63 | - CALMs<br>- Subcutaneous neurofibromas<br>- Spinal neurofibromas<br>- Spine deformities (joint spondylosis)<br>- Cardiovascular disorders (hypertension)                                                    | G2 |
| NF_71 | F | 40 | - CALMs<br>- Cutaneous and subcutaneous neurofibromas<br>- Plexiform neurofibroma of the buttock region<br>- Spine deformities (scoliosis)<br>- Anxiety disorder<br>- 25-OH Vitamin D deficiency             | G2 |

|        |   |    |                                                                                                                                                                                                                                                                                                             |    |
|--------|---|----|-------------------------------------------------------------------------------------------------------------------------------------------------------------------------------------------------------------------------------------------------------------------------------------------------------------|----|
| NF_77  | M | 20 | <ul style="list-style-type: none"> <li>- CALMs</li> <li>- Cutaneous neurofibromas</li> <li>- Axillary and inguinal freckling</li> <li>- Spine (scoliosis) and bone (dural ectasia) deformities</li> <li>- Cardiovascular disorders (mild tricuspid valve insufficiency)</li> </ul>                          | G2 |
| NF_80  | M | 32 | <ul style="list-style-type: none"> <li>- Cutaneous neurofibromas</li> <li>- Lisch nodules</li> <li>- UBOs</li> </ul>                                                                                                                                                                                        | G2 |
| NF_86  | F | 57 | <ul style="list-style-type: none"> <li>- CALMs</li> <li>- Spine (scoliosis) and bone (osteoporosis) deformities</li> </ul>                                                                                                                                                                                  | G2 |
| NF_90  | F | 26 | <ul style="list-style-type: none"> <li>- CALMs</li> <li>- Cutaneous and subcutaneous neurofibromas</li> <li>- Spine (scoliosis) and bone deformities (foot deformities)</li> <li>- UBOs</li> </ul>                                                                                                          | G2 |
| NF_94  | M | 59 | <ul style="list-style-type: none"> <li>- CALMs</li> <li>- Ischemic cerebrovascular disease</li> <li>- Bone deformities (short stature)</li> <li>- Mental retardation</li> <li>- Glaucoma</li> </ul>                                                                                                         | G2 |
| NF_96  | F | 70 | <ul style="list-style-type: none"> <li>- CALMs</li> <li>- Cutaneous and subcutaneous neurofibromas</li> <li>- Spine (scoliosis and joint spondylosis) and bone deformities (osteopenia and osteoporosis)</li> <li>- Cardiovascular disorder (hypertension)</li> <li>- 25-OH Vitamin D deficiency</li> </ul> | G2 |
| NF_100 | F | 57 | <ul style="list-style-type: none"> <li>- CALMs</li> <li>- Cutaneous neurofibromas</li> <li>- Spine deformities (joint spondylosis)</li> <li>- Cardiovascular disorders (hypertension)</li> <li>- Anxiety and depressive disorders</li> <li>- Hepatic steatosis</li> </ul>                                   | G2 |
| NF_102 | M | 33 | <ul style="list-style-type: none"> <li>- CALMs</li> <li>- Cutaneous and subcutaneous neurofibromas</li> <li>- Spine (kyphosis) and bone deformities</li> <li>- UBOs</li> </ul>                                                                                                                              | G2 |
| NF_103 | M | 24 | <ul style="list-style-type: none"> <li>- CALMs</li> <li>- Spine deformities (scoliosis)</li> <li>- Freckling</li> <li>- Lisch nodules</li> </ul>                                                                                                                                                            | G2 |

|        |   |    |                                                                                                                                                                                                                                                                                                                                                                                      |    |
|--------|---|----|--------------------------------------------------------------------------------------------------------------------------------------------------------------------------------------------------------------------------------------------------------------------------------------------------------------------------------------------------------------------------------------|----|
|        |   |    | <ul style="list-style-type: none"> <li>- Neurofibromas</li> <li>- Thorax abnormalities</li> </ul>                                                                                                                                                                                                                                                                                    |    |
| NF_18  | F | 22 | <ul style="list-style-type: none"> <li>- Lisch nodules</li> <li>- Spine (scoliosis) and bone deformities (non-ossifying fibroma of tibia)</li> <li>- UBOs</li> <li>- Learning disabilities</li> <li>- Lumbar spinal MPNST</li> </ul>                                                                                                                                                 | G3 |
| NF_52  | M | 46 | <ul style="list-style-type: none"> <li>- CALMs</li> <li>- Cutaneous and subcutaneous neurofibromas</li> <li>- MPNST of the left limb</li> <li>- GIST</li> </ul>                                                                                                                                                                                                                      | G3 |
| NF_127 | M | 19 | <ul style="list-style-type: none"> <li>- Intracranial MPNST</li> </ul>                                                                                                                                                                                                                                                                                                               | G3 |
| NF_6   | F | 33 | <ul style="list-style-type: none"> <li>- CALMs</li> <li>- Cutaneous and subcutaneous neurofibromas</li> <li>- Inguinal freckling</li> <li>- Spine (scoliosis) and bone (osteoporosis) deformities</li> <li>- Cardiovascular disorders (heart murmur)</li> <li>- Optic glioma</li> </ul>                                                                                              | G4 |
| NF_17  | F | 26 | <ul style="list-style-type: none"> <li>- CALMs</li> <li>- Cutaneous neurofibromas</li> <li>- Axillary and inguinal freckling</li> <li>- Bone deformities (short stature)</li> <li>- Spinal optic neurofibroma</li> <li>- Malignant tumor at sacral region</li> </ul>                                                                                                                 | G4 |
| NF_26  | F | 35 | <ul style="list-style-type: none"> <li>- CALMs</li> <li>- Subcutaneous neurofibromas</li> <li>- Spinal neurofibromas</li> <li>- Lisch nodules</li> <li>- Spine (scoliosis) and bone (dural ectasia) deformities</li> <li>- Multiple intraforaminal and paravertebral plexiform neurofibromas</li> <li>- UBOs</li> <li>- Anxiety disorder</li> <li>- Pilocytic astrocytoma</li> </ul> | G4 |
| NF_35  | M | 55 | <ul style="list-style-type: none"> <li>- Cutaneous neurofibromas</li> <li>- Orbito-temporal plexiform neurofibroma</li> <li>- Chondropathy</li> <li>- Diverticulosis</li> <li>- 25-OH Vitamin D deficiency</li> <li>- Spinal neurinoma</li> </ul>                                                                                                                                    | G4 |
| NF_36  | M | 42 | <ul style="list-style-type: none"> <li>- CALMs</li> <li>- Cutaneous and subcutaneous neurofibromas</li> </ul>                                                                                                                                                                                                                                                                        | G4 |

|       |   |    |                                                                                                                                                                                                                                                                                                     |    |
|-------|---|----|-----------------------------------------------------------------------------------------------------------------------------------------------------------------------------------------------------------------------------------------------------------------------------------------------------|----|
|       |   |    | <ul style="list-style-type: none"> <li>- Axillary and inguinal freckling</li> <li>- Spine deformities (scoliosis)</li> <li>- Spinal neuromas</li> </ul>                                                                                                                                             |    |
| NF_37 | M | 23 | <ul style="list-style-type: none"> <li>- CALMs</li> <li>- Cutaneous and subcutaneous neurofibromas</li> <li>- Spinal neurofibromas</li> <li>- Spine deformities (scoliosis)</li> <li>- Bilateral thalamic UBOs</li> <li>- C2 ganglioneuroma</li> </ul>                                              | G4 |
| NF_41 | F | 58 | <ul style="list-style-type: none"> <li>- CALMs</li> <li>- Cutaneous neurofibromas</li> <li>- Axillary and inguinal freckling</li> <li>- Spine deformities (scoliosis)</li> <li>- Hearing loss</li> <li>- Cardiovascular disorders (hypertension)</li> <li>- Optic glioma</li> <li>- MGUS</li> </ul> | G4 |
| NF_60 | F | 42 | <ul style="list-style-type: none"> <li>- CALMs</li> <li>- Subcutaneous neurofibromas</li> <li>- Spine (scoliosis) and bone (short stature) deformities</li> <li>- UBOs</li> <li>- 25-OH Vitamin D deficiency</li> <li>- Astrocytoma</li> </ul>                                                      | G4 |
| NF_65 | F | 30 | <ul style="list-style-type: none"> <li>- CALMs</li> <li>- Cutaneous and subcutaneous neurofibromas</li> <li>- Spine deformities (scoliosis)</li> <li>- Hearing loss</li> <li>- Learning disabilities</li> <li>- Cardiovascular disorder (hypertension)</li> <li>- Optic glioma</li> </ul>           | G4 |
| NF_67 | M | 52 | <ul style="list-style-type: none"> <li>- CALMs</li> <li>- Cutaneous and subcutaneous neurofibromas</li> <li>- Spinal neurofibromas</li> <li>- Severe spastic tetraparesis</li> <li>- Spinal astrocytoma</li> </ul>                                                                                  | G4 |
| NF_70 | F | 49 | <ul style="list-style-type: none"> <li>- Cutaneous and subcutaneous neurofibromas</li> <li>- Spine deformities (scoliosis)</li> <li>- Anxiety disorder</li> <li>- Cardiovascular disorder (heart murmur)</li> <li>- Microcytic anemia</li> </ul>                                                    | G4 |



|       |   |    |                                                                                                                                                                                                                                                                                                                                                               |    |
|-------|---|----|---------------------------------------------------------------------------------------------------------------------------------------------------------------------------------------------------------------------------------------------------------------------------------------------------------------------------------------------------------------|----|
|       |   |    | <ul style="list-style-type: none"> <li>- Vitamin D 25-OH deficiency</li> <li>- Optic glioma</li> </ul>                                                                                                                                                                                                                                                        |    |
| NF_72 | M | 38 | <ul style="list-style-type: none"> <li>- Cutaneous neurofibromas</li> <li>- Lisch nodules</li> <li>- Spinal neurofibromas</li> <li>- Spine deformities (scoliosis)</li> <li>- Vitamin D 25-OH deficiency</li> <li>- Optic glioma</li> <li>- Astrocytoma</li> </ul>                                                                                            | G4 |
| NF_76 | M | 33 | <ul style="list-style-type: none"> <li>- CALMs</li> <li>- Cutaneous neurofibromas</li> <li>- Axillary freckling</li> <li>- Lisch nodules</li> <li>- Anxiety disorder</li> <li>- Optic glioma</li> </ul>                                                                                                                                                       | G4 |
| NF_81 | F | 30 | <ul style="list-style-type: none"> <li>- CALMs</li> <li>- Spinal neurofibromas</li> <li>- Lisch nodules</li> <li>- Spine deformities (scoliosis)</li> <li>- Anxiety and depressive disorder</li> <li>- Epilepsy syndrome</li> <li>- Hearing loss</li> <li>- Optic glioma</li> <li>- Gangliocytoma</li> <li>- Learning disabilities</li> <li>- UBOs</li> </ul> | G4 |
| NF_82 | F | 30 | <ul style="list-style-type: none"> <li>- CALMs</li> <li>- Subcutaneous neurofibromas</li> <li>- Spinal neurofibromas</li> <li>- Spine deformities (scoliosis)</li> <li>- 25-OH Vitamin D deficiency</li> <li>- UBOs</li> <li>- Retroperitoneal ganglioneuroma</li> </ul>                                                                                      | G4 |
| NF_85 | F | 24 | <ul style="list-style-type: none"> <li>- Plexiform neurofibroma along the third branches of the trigeminal nerve</li> <li>- Spine deformities (kyphoscoliosis)</li> <li>- Optic glioma</li> </ul>                                                                                                                                                             | G4 |
| NF_99 | F | 47 | <ul style="list-style-type: none"> <li>- CALMs</li> <li>- Cutaneous neurofibromas</li> <li>- Anxiety disorder</li> <li>- Spine deformities (scoliosis)</li> <li>- Retroperitoneal ganglioneuroma</li> </ul>                                                                                                                                                   | G4 |

|        |   |    |                                                                                                                                                                                                                                                                                                                                                    |    |
|--------|---|----|----------------------------------------------------------------------------------------------------------------------------------------------------------------------------------------------------------------------------------------------------------------------------------------------------------------------------------------------------|----|
| NF_115 | F | 28 | <ul style="list-style-type: none"> <li>- CALMs</li> <li>- Cutaneous and subcutaneous neurofibromas</li> <li>- Lisch nodules</li> <li>- Bone deformities (foot deformities)</li> <li>- Optic glioma</li> </ul>                                                                                                                                      | G4 |
| NF_15  | M | 31 | <ul style="list-style-type: none"> <li>- CALMs</li> <li>- Cutaneous neurofibromas</li> <li>- Spine deformities (loss of the normal cervical lordosis)</li> <li>- Cardiovascular disorder (hypertension)</li> <li>- Retinopathy</li> <li>- Infundibular/hypothalamus lipoma</li> </ul>                                                              | G5 |
| NF_19  | F | 25 | <ul style="list-style-type: none"> <li>- CALMs</li> <li>- Cutaneous and subcutaneous neurofibromas</li> <li>- Axillary freckling</li> <li>- Spine deformities (loss of the normal cervical lordosis)</li> <li>- Depressive disorder</li> <li>- Pheochromocytoma/paraganglioma</li> </ul>                                                           | G5 |
| NF_22  | F | 46 | <ul style="list-style-type: none"> <li>- CALMs</li> <li>- Cutaneous and subcutaneous neurofibromas</li> <li>- Lisch nodules</li> <li>- Spine (scoliosis) and bone (osteoporosis) deformities</li> <li>- Cardiovascular disorders (hypertension)</li> <li>- Tethered Cord syndrome</li> <li>- Spinal dysraphism</li> <li>- Breast cancer</li> </ul> | G5 |
| NF_23  | F | 57 | <ul style="list-style-type: none"> <li>- CALMs</li> <li>- Cutaneous neurofibromas</li> <li>- Bone deformities (short stature)</li> <li>- Breast cancer</li> </ul>                                                                                                                                                                                  | G5 |
| NF_29  | M | 52 | <ul style="list-style-type: none"> <li>- Spinal neurofibromas</li> <li>- Lisch nodules</li> <li>- Bone deformities (foot deformities)</li> <li>- Epilepsy syndrome</li> <li>- Seminoma</li> </ul>                                                                                                                                                  | G5 |
| NF_31  | M | 21 | <ul style="list-style-type: none"> <li>- CALMs</li> <li>- Spinal neurofibromas</li> <li>- Bilateral paravertebral plexiform neurofibroma</li> <li>- Spine deformities (scoliosis)</li> <li>- Brugada syndrome</li> <li>- Learning disabilities</li> </ul>                                                                                          | G5 |

|       |   |    |                                                                                                                                                                                                                                                            |    |
|-------|---|----|------------------------------------------------------------------------------------------------------------------------------------------------------------------------------------------------------------------------------------------------------------|----|
|       |   |    | - Gallbladder adenomyomatosis                                                                                                                                                                                                                              |    |
| NF_32 | M | 21 | - CALMs<br>- Spinal neurofibromas<br>- Spine deformities (scoliosis)<br>- Brugada syndrome<br>- Adenomyomatosis                                                                                                                                            | G5 |
| NF_39 | M | 27 | - Spine deformities (loss of the normal cervical lordosis)<br>- Anxiety disorder<br>- Vascular anomalies<br>- Femur ossifying fibromas                                                                                                                     | G5 |
| NF_42 | F | 44 | - CALMs<br>- Axillary and inguinal freckling<br>- Spine (joint spondylosis) and bone (cervical spondylosis) deformities<br>- Anxiety and depressive disorder<br>- Sleep disorder<br>- Nabothian cysts<br>- Fibromioma                                      | G5 |
| NF_55 | F | 52 | - CALMs<br>- Cutaneous and subcutaneous neurofibromas<br>- Spine (scoliosis) and bone (osteopenia and foot deformities) deformities<br>- Hypercholesterolemia<br>- 25-OH Vitamin D deficiency<br>- Uterine myomas                                          | G5 |
| NF_73 | M | 37 | - CALMs<br>- Cutaneous and subcutaneous neurofibromas<br>- Spinal neurofibroma<br>- Lisch nodules<br>- Spine (loss of the normal cervical lordosis) and bone (heterometry of the lower limbs) deformities<br>- Learning disabilities<br>- Pheochromocytoma | G5 |
| NF_78 | F | 47 | - CALMs<br>- Cutaneous neurofibromas<br>- Spine deformities (scoliosis)<br>- Hearing loss<br>- Uterine myoma<br>- Cholesteatoma (left ear)                                                                                                                 | G5 |

|        |   |    |                                                                                                                                                                                                                                                                                                                                                        |    |
|--------|---|----|--------------------------------------------------------------------------------------------------------------------------------------------------------------------------------------------------------------------------------------------------------------------------------------------------------------------------------------------------------|----|
| NF_79  | F | 45 | <ul style="list-style-type: none"> <li>- Cutaneous neurofibromas</li> <li>- Lisch nodules</li> <li>- Spine deformities (scoliosis)</li> <li>- Dorso-lumbar CSF cyst</li> <li>- Tubular adenoma</li> </ul>                                                                                                                                              | G5 |
| NF_87  | M | 51 | <ul style="list-style-type: none"> <li>- Cutaneous neurofibromas</li> <li>- Cardiovascular disorder (hypertension)</li> <li>- Hypercholesterolemia</li> <li>- Prostate cancer</li> </ul>                                                                                                                                                               | G5 |
| NF_92  | M | 56 | <ul style="list-style-type: none"> <li>- CALMs</li> <li>- Spinal neurofibromas</li> <li>- Malar facial plexiform neurofibroma</li> <li>- Spine deformities (lost of the normal cervical lordosis)</li> <li>- Cardiovascular disorders (mitral and aortic insufficiency)</li> <li>- Hypercholesterolemia</li> <li>- Lymphoma</li> <li>- GIST</li> </ul> | G5 |
| NF_97  | F | 39 | <ul style="list-style-type: none"> <li>- CALMs</li> <li>- Cutaneous and subcutaneous neurofibromas</li> <li>- Spine (scoliosis) and bone deformities (pes cavus)</li> <li>- Breast cancer</li> </ul>                                                                                                                                                   | G5 |
| NF_98  | M | 60 | <ul style="list-style-type: none"> <li>- CALMs</li> <li>- Cutaneous and subcutaneous neurofibromas</li> <li>- Spine deformities (joint spondylosis)</li> <li>- Pheochromocytoma</li> </ul>                                                                                                                                                             | G5 |
| NF_101 | M | 21 | <ul style="list-style-type: none"> <li>- Cutaneous neurofibromas</li> <li>- Spine (scoliosis) and bone (non-ossifying fibromas of tibia) deformities</li> <li>- Cardiovascular disorders (aortic stenosis)</li> <li>- Moyamoya syndrome</li> </ul>                                                                                                     | G5 |
| NF_105 | M | 40 | <ul style="list-style-type: none"> <li>- CALMs</li> <li>- Cardiovascular disorder (hypertension)</li> <li>- Spinal neurofibromas</li> <li>- Bladder heteroplasia</li> <li>- Left thigh and leg malignant plexiform neurofibromas</li> </ul>                                                                                                            | G5 |

**Table S1. Demographics and phenotypic features according to clinical groups (G1-G5) in the NF1 cohort.** In column ID all NF1 patients were indicated with specific code (NF\_ followed by an Arabic number) corresponding to the 'unique patient identifier' of the clinical centre. Age is referred to age at diagnosis. Group 1 (G1) includes patients with classical NF1 phenotype, including 6 or more café-au-lait spots (CALMs), axillary and inguinal freckling, two or more Lisch nodules and neurofibromas, without other manifestations of extra-cutaneous/ocular involvement; Group 2 (G2) encloses NF1 patients presenting the phenotypic features of G1 plus involvement of skeletal apparatus, central nervous system (epilepsy, intracranial vascular malformations, hamartomas/UBOs) and mental system (intellectual disability, anxiety/depression/sleep disorders), vascular system and anomalies of internal organs; Group 3 (G3) includes NF1 patients presenting the phenotypic features of G1 plus multi-apparatus involvement and histological diagnosis of MPNST; Group 4 (G4) includes NF1 patients presenting the phenotypic features of group G1 plus multi-apparatus involvement and neoplasms of the central and peripheral nervous systems; Group 5 (G5) includes NF1 patients presenting the clinical traits of G1 plus multi-apparatus involvement and neoplasms of variable grade of various organs and apparatus. UBOs: Unidentified bright objects; MGUS: Monoclonal Gammopathy of Undetermined Significance; MPNST: Malignant Peripheral Nerve Sheath Tumor, GIST: Gastrointestinal stromal tumor. F: female, M: male.

| ID    | NF1 genetic mutation                           | Technique |                          |      | NGS                                           |               |               |               |
|-------|------------------------------------------------|-----------|--------------------------|------|-----------------------------------------------|---------------|---------------|---------------|
|       |                                                | NGS       | RT-PCR/Sanger sequencing | MLPA | Depth of the identified variants (TOT:WT:MUT) | Average depth | Depth minimum | Depth maximum |
| NF_1  | c.(586+1_587-1)_(730+1_731-1)del               | ✓         |                          |      |                                               | 125,15        | 15            | 297           |
| NF_2  | c.3G>A, p.?                                    | ✓         |                          |      | 11:3:8                                        | 146,39        | 10            | 413           |
| NF_3  | c.3G>A, p.?                                    |           | ✓                        |      |                                               |               |               |               |
| NF_4  | c.3G>A, p.?                                    |           | ✓                        |      |                                               |               |               |               |
| NF_5  | c.1595T>G, p.Leu532Arg                         |           | ✓                        |      |                                               |               |               |               |
| NF_6  | c.479+5G>A , p.Leu94fs                         | ✓         |                          |      | 91:47:44                                      | 132,61        | 15            | 340           |
| NF_8  | c.7884_7885del, p.(Phe2629Serfs*9)             | ✓         |                          |      | 79:33:46                                      | 106,34        | 20            | 299           |
| NF_10 | c.3826C>T, p.Arg1276*                          |           | ✓                        |      |                                               |               |               |               |
| NF_11 | c.3826C>T, p.Arg1276*                          |           | ✓                        |      |                                               |               |               |               |
| NF_13 | c.6892_6897del, p.Ala2298_Val2299del           | ✓         |                          |      | 249:142:107                                   | 217,75        | 13            | 651           |
| NF_15 | c.2619dup, p.Lys874*                           | ✓         |                          |      | 42:20:22                                      | 144,69        | 22            | 394           |
| NF_17 | c.6364+4A>G , p.Val2029Lysfs*7                 |           | ✓                        |      |                                               |               |               |               |
| NF_18 | c.3326T>G, p.Leu1109*                          |           | ✓                        |      |                                               |               |               |               |
| NF_19 | c.3826C>T , p.Arg1276*                         |           | ✓                        |      |                                               |               |               |               |
| NF_20 | c.1783_1784del, p.Glu595fs                     |           | ✓                        |      |                                               |               |               |               |
| NF_21 | c.(?-383)_(*3522_?)del<br>(whole NF1 deletion) | ✓         |                          |      |                                               | 99.5          | 15            | 185           |
| NF_22 | c.4982_4983del, p.Cys1661*                     | ✓         |                          |      | 123:68:55                                     | 129,83        | 26            | 373           |
| NF_23 | c.3496+1G>A , p.Tyr1106Leufs*28                |           | ✓                        |      |                                               |               |               |               |
| NF_25 | c.3496+1G>A, p.Tyr1106Leufs*28                 |           | ✓                        |      |                                               |               |               |               |
| NF_26 | c.1246C>T, p.R416*                             |           | ✓                        |      |                                               |               |               |               |

|       |                                                      |   |   |  |             |        |    |     |
|-------|------------------------------------------------------|---|---|--|-------------|--------|----|-----|
| NF_28 | c.1A>G, p.?                                          | ✓ |   |  | 13:1:12     | 132,34 | 15 | 382 |
| NF_29 | c.1595T>G, p.Leu532Arg                               |   | ✓ |  |             |        |    |     |
| NF_30 | c.3728T>C, p.Leu1243Pro                              | ✓ |   |  | 252:135:117 | 121,39 | 17 | 343 |
| NF_31 | c.7686delG, p.Ile2563Phefs*40                        |   | ✓ |  |             |        |    |     |
| NF_32 | c.7686delG, p.Ile2563Phefs*40                        |   | ✓ |  |             |        |    |     |
| NF_35 | c.4269+2T>C, p.?                                     |   | ✓ |  |             |        |    |     |
| NF_36 | c.6335T>C, p.Leu2112Pro                              |   | ✓ |  |             |        |    |     |
| NF_37 | c.(?_-383)_(*3522_?)del<br>(whole NF1 deletion)      | ✓ |   |  |             | 96,21  | 12 | 175 |
| NF_38 | c.4768C>T, p.Arg1590Trp                              |   | ✓ |  |             |        |    |     |
| NF_39 | c.1009G>T, p.Glu337*                                 | ✓ |   |  | 261:130:131 | 172,53 | 22 | 495 |
| NF_40 | c.1466A>G, p.Tyr489Cys                               | ✓ |   |  | 60:25:35    | 185,38 | 45 | 498 |
| NF_41 | c.1499_1501delinsAAA,<br>p.Ile500_His501delinsLysAsn |   | ✓ |  |             |        |    |     |
| NF_42 | c.3502-3519 del, p.G1169-L1173del                    |   | ✓ |  |             |        |    |     |
| NF_43 | c.2352G>C, p.Trp784Cys                               | ✓ |   |  | 26:11:15    | 122,02 | 52 | 352 |
| NF_45 | c.2307dup, p.Thr770HisfsTer6                         | ✓ |   |  | 254:132:122 | 152,66 | 10 | 401 |
| NF_46 | c.2307dup, p.Thr770HisfsTer6                         | ✓ |   |  | 254:132:122 | 150,09 | 11 | 419 |
| NF_47 | c.2307dup, p.Thr770HisfsTer6                         | ✓ |   |  | 190:106:84  | 149,78 | 17 | 422 |
| NF_48 | c.1A>G, p.?                                          | ✓ |   |  | 23:9:14     | 142,97 | 24 | 391 |
| NF_50 | c.3497_3974del                                       |   | ✓ |  |             |        |    |     |
| NF_51 | c.4381dup, p.Ile1461Asnfs*4                          | ✓ |   |  | 63:35:28    | 124,44 | 25 | 335 |
| NF_52 | c.4309G>T, p.(Glu1437*)                              | ✓ |   |  | 60:26:34    | 122,34 | 12 | 442 |
| NF_53 | c.1378dup, p.Ile460Asnfs*10                          | ✓ |   |  | 212:108:104 | 156,18 | 11 | 426 |
| NF_54 | c.1639G>T, p.Glu547*                                 | ✓ |   |  | 81:38:43    | 162,43 | 10 | 442 |
| NF_55 | c.4537C>T, p.Arg1513*                                | ✓ |   |  | 49:23:26    | 181,98 | 33 | 495 |
| NF_56 | c.2409+1G>A, p.?.; c.2375T>A,<br>p.Leu792His         | ✓ |   |  | 33:17:16    | 158,46 | 32 | 445 |
| NF_57 | c.1381C>T, p.Arg461*                                 | ✓ |   |  | 167:85:82   | 134,68 | 21 | 374 |
| NF_59 | c.4270-2A>G, p.Ile1424_Gln1426del                    | ✓ |   |  | 46:28:18    | 144,01 | 20 | 402 |

|       |                                                  |   |   |   |             |        |    |     |
|-------|--------------------------------------------------|---|---|---|-------------|--------|----|-----|
| NF_60 | c.1756_1759del, p.Thr586Valfs*18                 | ✓ |   |   | 35:16:19    | 125,90 | 19 | 339 |
| NF_61 | c.4367+2T>C , p.?                                |   | ✓ |   |             |        |    |     |
| NF_62 | c.1260+1G>A, p.Ser421fs                          | ✓ |   |   | 101:58:43   | 172,98 | 17 | 488 |
| NF_63 | c.4733C>A, p.(Ser1578Tyr )                       | ✓ |   |   | 159:79:80   | 194,49 | 16 | 509 |
| NF_65 | c.(?-383)_(*3522_?)del<br>(whole NF1 deletion)   | ✓ |   |   |             | 82,03  | 13 | 154 |
| NF_66 | c.2665 A>G, p.Thr889Ala                          | ✓ |   |   | 54:35:19    | 168,88 | 15 | 415 |
| NF_67 | c.6084+1G>A , p.?                                | ✓ |   |   | 199:105:94  | 224,34 | 26 | 542 |
| NF_68 | c. 6792C>A , p.Ala2253_Lys2286del                |   | ✓ |   |             |        |    |     |
| NF_70 | c.2409+1G>C , p.?                                | ✓ |   |   | 35:24:11    | 196,06 | 32 | 510 |
| NF_71 | c.2409+1G>C , p.?                                | ✓ |   |   | 53:28:25    | 184,97 | 25 | 506 |
| NF_72 | c.7884_7885del, p.Phe2629Serfs*9                 | ✓ |   |   | 242:126:116 | 237,30 | 11 | 592 |
| NF_73 | c.4923G>A, p.Trp1641*                            |   | ✓ |   |             |        |    |     |
| NF_76 | c.1845+1_1845+5del,<br>p.Ala548_Lys615del        | ✓ |   |   | 92:47:45    | 194,93 | 15 | 529 |
| NF_77 | c.2326G>A, p.Ala776_Gln803del                    |   | ✓ |   |             |        |    |     |
| NF_78 | c.2329T>C, p.Trp777Arg                           | ✓ |   |   | 37:23:14    | 226,59 | 14 | 592 |
| NF_79 | c.3916C>T, p.Arg1306*, c.1975C>T,<br>p.Arg659Trp | ✓ |   |   | 145:71:74   | 211,39 | 10 | 544 |
| NF_80 | c.4278G>C, p. Gln1426His                         | ✓ |   |   | 58:30:28    | 151,59 | 15 | 385 |
| NF_81 | c.5819del, p.(Lys1940Serfs*18)                   | ✓ |   |   | 131:61:70   | 175,05 | 19 | 459 |
| NF_82 | c.8051-1 G>C , p.?                               | ✓ |   |   | 63:23:40    | 142,41 | 17 | 387 |
| NF_83 | c.5673T>G, p.Ser1891Arg                          | ✓ |   |   | 111:60:51   | 221,46 | 13 | 587 |
| NF_85 | c.6621dup, p.Trp2208Valfs*13                     | ✓ |   |   | 285:145:140 | 162,50 | 12 | 423 |
| NF_86 | c.4923G>A, p.Trp1641*                            | ✓ |   |   | 156:78:78   | 181,44 | 11 | 431 |
| NF_87 | c.7259C>A, p.Ala2420Asp                          |   | ✓ |   |             |        |    |     |
| NF_89 | c.(4661+1_4662-1)_(7258+1_7259-1)dup             | ✓ |   | ✓ |             |        |    |     |
| NF_90 | c.(4661+1_4662-1)_(7258+1_7259-1)dup             | ✓ |   | ✓ |             |        |    |     |
| NF_92 | c.4278G>C. p.Gln1426His                          | ✓ |   |   | 71:35:36    | 165,75 | 26 | 447 |
| NF_94 | c.2252-3T>G, p.?                                 | ✓ |   |   | 195:85:110  | 134,13 | 24 | 369 |



|        |                                                       |   |   |  |          |        |    |     |
|--------|-------------------------------------------------------|---|---|--|----------|--------|----|-----|
| NF_96  | c.(?-383)_(*3522_?)del<br>(whole <i>NF1</i> deletion) | ✓ |   |  |          | 79,50  | 12 | 165 |
| NF_97  | c.4515-2A>G , p.?                                     | ✓ |   |  | 28:5:23  | 151,35 | 22 | 395 |
| NF_98  | c.7089dup, p.Asn2364*                                 |   | ✓ |  |          |        |    |     |
| NF_99  | c.2851G>T, p.Val951Phe                                |   | ✓ |  |          |        |    |     |
| NF_100 | c.4537C>T , p.Arg1513*                                | ✓ |   |  | 41:50:11 | 142,88 | 21 | 394 |
| NF_101 | c.1329delT, p.Phe443Leufs*29                          |   | ✓ |  |          |        |    |     |
| NF_102 | c.1381C>T, p.Arg461*                                  |   | ✓ |  |          |        |    |     |
| NF_103 | c.2251 G>C , p.Asp668Glufs*9                          |   | ✓ |  |          |        |    |     |
| NF_105 | c.C7532T, p.(Ala2532Val)                              |   | ✓ |  |          |        |    |     |
| NF_115 | c.2446C>T, p.Arg816*                                  |   | ✓ |  |          |        |    |     |
| NF_127 | c.2540T>G, p.Leu847Arg                                |   | ✓ |  |          |        |    |     |

**Table S2. Sequencing techniques performed and NGS details.** Next-generation sequencing (NGS), Real Time PCR (RT-PCR), Sanger sequencing, and Multiple Ligation Probe Amplification (MLPA) were applied to *NF1* mutation analysis. NGS details including depth of the identified *NF1* variants, average depth, minimum and maximum depth are shown.
